# Supplementary material for: Skewed macrophage polarization in aging skeletal muscle
Source: PubMed Central journal article supplement (PMC6826159; doi:10.1111/acel.13032), 2019-09-02
Supplement: ACEL-18-e13032-s001.pdf [file ACEL-18-e13032-s001.pdf]

**Table S1: Genes significantly down regulated in Old BALB/c SKM**

| <b>Genes</b>             | <b>Fold changes (O/Y)</b> | <b>RefSeq Acc</b> | <b>MGI</b>  |
|--------------------------|---------------------------|-------------------|-------------|
| <i>Spock3</i>            | 0.07                      | NM_023689.2       | MGI:1920152 |
| <i>Nrk</i>               | 0.07                      |                   | MGI:1351326 |
| <i>Col11a1</i>           | 0.08                      | NM_007729.1       | MGI:88446   |
| <i>Col1a1</i>            | 0.09                      | NM_007742.3       | MGI:88467   |
| <i>Col1a2</i>            | 0.09                      | NM_007743.2       | MGI:88468   |
| <i>Col2a1</i>            | 0.1                       |                   | MGI:88452   |
| <i>Cilp2</i>             | 0.11                      |                   | MGI:1915959 |
| <i>Col3a1</i>            | 0.12                      | NM_009930.1       | MGI:88453   |
| <i>1810005K13Rik</i>     | 0.13                      |                   | MGI:1913505 |
| <i>Wif1</i>              | 0.14                      | NM_011915.1       | MGI:1344332 |
| <i>Scg3</i>              | 0.16                      | NM_009130.1       | MGI:103032  |
| <i>Emid2</i>             | 0.16                      | NM_024474.2       | MGI:2155345 |
| <i>Rian</i>              | 0.17                      |                   | MGI:1922995 |
| <i>D0H4S114</i>          | 0.17                      | NM_053078.3       | MGI:99444   |
| <i>Gm266</i>             | 0.18                      | NM_001033248.1    | MGI:2685112 |
| <i>Has3</i>              | 0.18                      | NM_008217.2       | MGI:109599  |
| <i>1500015O10Rik</i>     | 0.18                      | NM_024283.1       | MGI:1926146 |
| <i>Lsamp</i>             | 0.19                      |                   | MGI:3041227 |
| <i>Sparc</i>             | 0.19                      | NM_009242.1       | MGI:98373   |
| <i>Lpar3</i>             | 0.2                       | NM_022983.2       | MGI:1929469 |
| <i>Fras1</i>             | 0.21                      | NM_175473.2       | MGI:2385368 |
| <i>Prss35</i>            | 0.21                      | NM_178738.1       | MGI:2444800 |
| <i>Cd247</i>             | 0.21                      | NM_031162.1       | MGI:88334   |
| <i>Cthrc1</i>            | 0.21                      | NM_026778.1       | MGI:1915838 |
| <i>C1qtnf3</i>           | 0.22                      | NM_030888.2       | MGI:1932136 |
| <i>Fbn2</i>              | 0.22                      | NM_010181.2       | MGI:95490   |
| <i>Lass1</i>             | 0.22                      | NM_138647.1       | MGI:2136690 |
| <i>Spsb4</i>             | 0.23                      | NM_145134.2       | MGI:2183445 |
| <i>Ttbk1</i>             | 0.23                      |                   | MGI:2147036 |
| <i>Ccr11</i>             | 0.23                      |                   | MGI:2181676 |
| <i>Myl2</i>              | 0.23                      | NM_010861.2       | MGI:97272   |
| <i>C1qtnf6</i>           | 0.23                      | NM_028331.2       | MGI:1919959 |
| <i>Agtrl1</i>            | 0.23                      | NM_011784.2       | MGI:1346086 |
| <i>Mup4</i>              | 0.23                      | NM_008648.1       | MGI:97236   |
| <i>2200001115Rik</i>     | 0.23                      | NM_183278.1       | MGI:1916384 |
| <i>Akap5</i>             | 0.24                      |                   | MGI:1918024 |
| <i>Mup1</i>              | 0.24                      | NM_031188.1       | MGI:97233   |
| <i>B830012L14Rik</i>     | 0.24                      |                   | MGI:2443332 |
| <i>Mup2</i>              | 0.24                      | NM_001045550.1    | MGI:97234   |
| <i>Pcdh17</i>            | 0.24                      | NM_001013753.1    | MGI:2684924 |
| <i>Grid2</i>             | 0.24                      |                   | MGI:95813   |
| <i>Col13a1</i>           | 0.26                      | NM_007731.2       | MGI:1277201 |
| <i>Atp6v0a4</i>          | 0.26                      | NM_080467.2       | MGI:2153480 |
| <i>Col6a3</i>            | 0.26                      |                   | MGI:88461   |
| <i>1110018H23Rik</i>     | 0.28                      |                   | MGI:1915759 |
| <i>C430049B03Rik</i>     | 0.28                      |                   | MGI:1924903 |
| <i>OTTMUSG0000007485</i> | 0.28                      | NM_001012323.1    | MGI:3651981 |
| <i>1110068N23Rik</i>     | 0.28                      |                   |             |
| <i>Ptpla</i>             | 0.28                      | NM_013935.2       | MGI:1353592 |
| <i>Rnf182</i>            | 0.28                      | NM_183204.1       | MGI:3045355 |
| <i>Loxl2</i>             | 0.28                      | NM_033325.1       | MGI:2137913 |
| <i>Mirg</i>              | 0.29                      |                   | MGI:2670930 |
| <i>3110082D06Rik</i>     | 0.29                      |                   | MGI:1920485 |
| <i>Hpcal4</i>            | 0.29                      | NM_174998.1       | MGI:2157521 |
| <i>Cpz</i>               | 0.3                       | NM_153107.2       | MGI:88487   |
| <i>C730027P07Rik</i>     | 0.3                       |                   | MGI:3041196 |
| <i>Sfrp4</i>             | 0.3                       | NM_016687.1       | MGI:892010  |
| <i>Accn2</i>             | 0.3                       | NM_009597.1       | MGI:1194915 |
| <i>Serpinh1</i>          | 0.3                       | NM_009825.1       | MGI:88283   |
| <i>Chad</i>              | 0.31                      | NM_007689.2       | MGI:1096866 |

|                      |      |                |             |
|----------------------|------|----------------|-------------|
| <i>Fstl1</i>         | 0.31 | NM_008047.2    | MGI:102793  |
| <i>Stmn4</i>         | 0.31 | NM_019675.2    | MGI:1931224 |
| <i>Abi3bp</i>        | 0.32 |                | MGI:2444583 |
| <i>Sliitrk6</i>      | 0.32 | NM_175499.2    | MGI:2443198 |
| <i>Wnt2</i>          | 0.32 | NM_023653.3    | MGI:98954   |
| <i>Hes5</i>          | 0.32 | NM_010419.2    | MGI:104876  |
| <i>Pdgfrl</i>        | 0.32 | NM_026840.2    | MGI:1916047 |
| <i>Adams12</i>       | 0.32 | NM_175501.1    |             |
| <i>A430110N23Rik</i> | 0.32 | NM_173008.1    | MGI:3606211 |
| <i>Svopl</i>         | 0.33 |                | MGI:2444335 |
| <i>Scube2</i>        | 0.33 | NM_020052.1    | MGI:1928765 |
| <i>D430019H16Rik</i> | 0.33 |                | MGI:2443127 |
| <i>Dmp1</i>          | 0.33 | NM_016779.2    | MGI:94910   |
| <i>Matn4</i>         | 0.33 | NM_013592.2    | MGI:1328314 |
| <i>Col6a1</i>        | 0.34 | NM_009933.2    | MGI:88459   |
| <i>Abhd7</i>         | 0.34 | NM_001001804.1 | MGI:2686228 |
| <i>Pdzd7</i>         | 0.34 | NM_177605.3    | MGI:3608325 |
| <i>Serpinf1</i>      | 0.34 |                | MGI:108080  |
| <i>Egfl6</i>         | 0.35 | NM_019397.1    | MGI:1858599 |
| <i>Mest</i>          | 0.35 | NM_008590.1    | MGI:96968   |
| <i>Pdzd2</i>         | 0.35 |                | MGI:1922394 |
| <i>BC017612</i>      | 0.35 | NM_133214.2    | MGI:3039636 |
| <i>Cited1</i>        | 0.35 | NM_007709.3    | MGI:108023  |
| <i>Nlgn1</i>         | 0.35 | NM_138666.2    | MGI:2179435 |
| <i>Thy1</i>          | 0.35 | NM_009382.2    | MGI:98747   |
| <i>C130034I18Rik</i> | 0.35 | NM_177233.5    | MGI:2444563 |
| <i>E430002G05Rik</i> | 0.36 | NM_173749.3    | MGI:2445082 |
| <i>Itm2a</i>         | 0.36 | NM_008409.2    | MGI:107706  |
| <i>Lrrn2</i>         | 0.36 | NM_010732.1    | MGI:106037  |
| <i>Myh7</i>          | 0.36 | NM_080728.2    | MGI:2155600 |
| <i>Cntnap2</i>       | 0.36 | NM_001004357.1 | MGI:1914047 |
| <i>BC062109</i>      | 0.36 | NM_182841.1    | MGI:3041258 |
| <i>Col12a1</i>       | 0.36 | NM_007730.2    | MGI:88448   |
| <i>Pla2g12b</i>      | 0.36 | NM_023530.2    | MGI:1917086 |
| <i>Pcolce</i>        | 0.37 |                | MGI:105099  |
| <i>Rgs9bp</i>        | 0.37 | NM_145840.2    | MGI:2384418 |
| <i>Npas4</i>         | 0.37 | NM_153553.2    | MGI:2664186 |
| <i>Gltsd2</i>        | 0.38 | NM_029102.1    | MGI:1922032 |
| <i>EG622304</i>      | 0.38 |                | MGI:3643355 |
| <i>Ndrg4</i>         | 0.38 | NM_145602.2    | MGI:2384590 |
| <i>Samd5</i>         | 0.38 | NM_177271.3    | MGI:2444815 |
| <i>Nog</i>           | 0.38 | NM_008711.1    | MGI:104327  |
| <i>Mfap5</i>         | 0.38 | NM_015776.2    | MGI:1354387 |
| <i>Acan</i>          | 0.38 | NM_007424.2    | MGI:99602   |
| <i>2810022L02Rik</i> | 0.39 | NM_144882.2    | MGI:1914448 |
| <i>Gm1574</i>        | 0.39 | NM_001005422.1 | MGI:2686420 |
| <i>Fn1</i>           | 0.39 | NM_010233.1    | MGI:95566   |
| <i>Zfp385b</i>       | 0.39 | NM_178723.3    | MGI:2444734 |
| <i>Wisp1</i>         | 0.39 | NM_018865.2    | MGI:1197008 |
| <i>Fgf6</i>          | 0.39 | NM_010204.1    | MGI:95520   |
| <i>Pacsin1</i>       | 0.39 | NM_011861.1    | MGI:1345181 |
| <i>Snap91</i>        | 0.39 | NM_013669.1    | MGI:109132  |
| <i>Olfir884</i>      | 0.39 | NM_001011798.1 |             |
| <i>Col5a1</i>        | 0.39 | NM_015734.1    | MGI:88457   |
| <i>Nov</i>           | 0.39 | NM_010930.4    | MGI:109185  |
| <i>Chst2</i>         | 0.39 |                | MGI:1891160 |
| <i>Col5a2</i>        | 0.4  | NM_007737.2    | MGI:88458   |
| <i>Trim59</i>        | 0.4  | NM_025863.2    | MGI:1914199 |
| <i>A930018M24Rik</i> | 0.4  |                | MGI:2686053 |
| <i>Hmcn1</i>         | 0.4  |                | MGI:2685047 |
| <i>Hunk</i>          | 0.4  | NM_015755.2    | MGI:1347352 |
| <i>Postn</i>         | 0.4  | NM_015784.2    | MGI:1926321 |
| <i>Robo1</i>         | 0.4  | NM_019413.1    | MGI:1274781 |

|                  |      |                |             |
|------------------|------|----------------|-------------|
| <i>Col16a1</i>   | 0.4  | NM_028266.3    | MGI:1095396 |
| 4933417E11Rik    | 0.41 |                | MGI:1918384 |
| <i>Aldh1l2</i>   | 0.41 | NM_153543.1    | MGI:2444680 |
| 9930023K05Rik    | 0.41 | NM_172641.1    | MGI:2443041 |
| <i>Olfml2b</i>   | 0.41 | NM_177068.3    | MGI:2443310 |
| <i>Col24a1</i>   | 0.41 | NM_027770.2    | MGI:1918605 |
| D4Bwg0951e       | 0.41 | NM_026821.2    | MGI:106510  |
| <i>Kctd12b</i>   | 0.41 | NM_175429.3    | MGI:2444667 |
| <i>C1qtnf5</i>   | 0.41 | NM_001040632.1 | MGI:2385958 |
| <i>Cercam</i>    | 0.41 | NM_207298.2    | MGI:2139134 |
| <i>Tub</i>       | 0.41 | NM_021885.4    | MGI:2651573 |
| <i>Cdh20</i>     | 0.41 | NM_011800.2    | MGI:1346069 |
| <i>Dusp10</i>    | 0.42 | NM_022019.2    | MGI:1927070 |
| <i>Il17d</i>     | 0.42 | NM_145837.1    | MGI:2446510 |
| <i>Xlr3c</i>     | 0.42 | NM_011727.1    | MGI:109505  |
| <i>Frmd7</i>     | 0.42 | NM_001037750.1 | MGI:2686379 |
| <i>Rad51ap1</i>  | 0.42 | NM_009013.2    | MGI:1098224 |
| <i>Dio2</i>      | 0.42 | NM_010050.1    | MGI:1338833 |
| <i>Tmc5</i>      | 0.42 | NM_028930.1    | MGI:1921674 |
| <i>Tmem45a</i>   | 0.42 | NM_019631.2    | MGI:1913122 |
| <i>Hist2h3c2</i> | 0.42 | NM_054045.2    | MGI:2448357 |
| <i>Grem2</i>     | 0.42 | NM_011825.1    | MGI:1344367 |
| <i>Fmod</i>      | 0.43 | NM_021355.2    | MGI:1328364 |
| <i>Mkx</i>       | 0.43 | NM_177595.2    | MGI:2687286 |
| <i>Mfap2</i>     | 0.43 | NM_008546.2    | MGI:99559   |
| 6430411K18Rik    | 0.43 |                |             |
| <i>Fndc1</i>     | 0.43 |                | MGI:1915905 |
| <i>Tmem119</i>   | 0.43 | NM_146162.1    | MGI:2385228 |
| <i>Cadm3</i>     | 0.43 | NM_053199.3    | MGI:2137858 |
| <i>Vcan</i>      | 0.43 |                | MGI:102889  |
| <i>Loxl4</i>     | 0.43 | NM_053083.2    | MGI:1914823 |
| <i>Rcn3</i>      | 0.43 | NM_026555.1    | MGI:1277122 |
| <i>Bfsp1</i>     | 0.43 | NM_009751.2    | MGI:101770  |
| <i>Tnmd</i>      | 0.44 | NM_022322.2    | MGI:1929885 |
| <i>Col14a1</i>   | 0.44 | NM_181277.2    | MGI:1341272 |
| <i>Prtg</i>      | 0.44 |                | MGI:2444710 |
| <i>Cd248</i>     | 0.44 | NM_054042.2    | MGI:1917695 |
| <i>Sec16b</i>    | 0.44 | NM_033354.2    | MGI:2148802 |
| <i>Igsf3</i>     | 0.44 | NM_207205.1    | MGI:1926158 |
| 1500005K14Rik    | 0.44 |                | MGI:1923816 |
| <i>Etv4</i>      | 0.44 | NM_008815.2    | MGI:99423   |
| <i>Tfrc</i>      | 0.44 | NM_011638.3    | MGI:98822   |
| <i>Dnmt3a</i>    | 0.44 | NM_007872.4    | MGI:1261827 |
| <i>Lox</i>       | 0.44 | NM_010728.1    | MGI:96817   |
| <i>Rasl10a</i>   | 0.45 | NM_145216.3    | MGI:1922918 |
| <i>Pde1a</i>     | 0.45 | NM_016744.2    | MGI:1201792 |
| <i>Adcy7</i>     | 0.45 | NM_001037724.1 | MGI:102891  |
| <i>Ecm2</i>      | 0.46 |                | MGI:3039578 |
| <i>Ppp2r2b</i>   | 0.46 | NM_028392.1    | MGI:1920180 |
| <i>Gpr34</i>     | 0.46 | NM_011823.2    | MGI:1346334 |
| <i>Actc1</i>     | 0.46 | NM_009608.1    | MGI:87905   |
| <i>Ntn4</i>      | 0.46 | NM_021320.2    | MGI:1888978 |
| <i>Igsf1</i>     | 0.46 | NM_177591.3    | MGI:2147913 |
| <i>Bambi</i>     | 0.46 | NM_026505.2    | MGI:1915260 |
| <i>Serp1b6b</i>  | 0.46 | NM_011454.1    | MGI:894688  |
| <i>Sdc2</i>      | 0.46 | NM_008304.2    | MGI:1349165 |
| <i>Esm1</i>      | 0.46 | NM_023612.3    | MGI:1918940 |
| <i>Insc</i>      | 0.46 | NM_173767.2    | MGI:1917942 |
| <i>Lgi2</i>      | 0.46 | NM_144945.2    | MGI:2180196 |
| <i>Kdelr3</i>    | 0.46 | NM_134090.1    | MGI:2145953 |
| <i>Col15a1</i>   | 0.47 | NM_009928.2    | MGI:88449   |
| <i>Antxr1</i>    | 0.47 | NM_054041.1    | MGI:1916788 |
| <i>Hebp2</i>     | 0.47 | NM_019487.3    | MGI:1860084 |

|                      |      |             |             |
|----------------------|------|-------------|-------------|
| <i>Spr</i>           | 0.47 |             | MGI:1914648 |
| <i>Cd40</i>          | 0.47 | NM_011611.2 | MGI:88336   |
| <i>B230217C12Rik</i> | 0.47 |             | MGI:1915377 |
| <i>Rcn1</i>          | 0.47 | NM_009037.2 | MGI:104559  |
| <i>BC061253</i>      | 0.48 |             | MGI:3039571 |
| <i>Tpbp</i>          | 0.48 | NM_011627.2 | MGI:1341264 |
| <i>Cited4</i>        | 0.48 |             | MGI:1861694 |
| <i>Leprel2</i>       | 0.48 | NM_013534.4 | MGI:1315208 |
| <i>Rsph1</i>         | 0.48 | NM_025290.3 | MGI:1194909 |
| <i>Arsi</i>          | 0.48 |             | MGI:2670959 |
| <i>Thbs3</i>         | 0.48 | NM_013691.1 | MGI:98739   |
| <i>Ptgis</i>         | 0.48 | NM_008968.2 | MGI:1097156 |
| <i>Evl</i>           | 0.48 | NM_007965.2 | MGI:1194884 |
| <i>Smox</i>          | 0.48 | NM_145533.1 | MGI:2445356 |
| <i>1110032E23Rik</i> | 0.48 | NM_133187.1 | MGI:1915909 |
| <i>Cd33</i>          | 0.48 | NM_021293.1 | MGI:99440   |
| <i>Igsf10</i>        | 0.48 | XM_887155.2 |             |
| <i>Dpysl3</i>        | 0.48 | NM_009468.1 | MGI:1349762 |
| <i>Etohi8</i>        | 0.48 |             | MGI:1261424 |
| <i>Hs6st3</i>        | 0.48 | NM_015820.1 | MGI:1354960 |
| <i>Amd1</i>          | 0.48 | NM_009665.3 | MGI:88004   |
| <i>2210419I08Rik</i> | 0.48 |             | MGI:1920913 |
| <i>Exoc7</i>         | 0.49 | NM_016857.1 | MGI:1859270 |
| <i>Mfap4</i>         | 0.49 | NM_029568.2 | MGI:1342276 |
| <i>Folr2</i>         | 0.49 | NM_008035.1 | MGI:95569   |
| <i>Bgn</i>           | 0.49 | NM_007542.3 | MGI:88158   |
| <i>Ptn</i>           | 0.49 |             | MGI:97804   |
| <i>Xrcc2</i>         | 0.49 | NM_020570.2 | MGI:1927345 |
| <i>Cdc6</i>          | 0.49 | NM_011799.2 | MGI:1345150 |
| <i>Hmgcll1</i>       | 0.49 | NM_173731.2 | MGI:2446108 |
| <i>Spin4</i>         | 0.49 | NM_178753.2 | MGI:2444925 |
| <i>Col4a1</i>        | 0.49 | NM_009931.1 | MGI:88454   |
| <i>Adamts2</i>       | 0.49 | NM_175643.2 | MGI:1347356 |
| <i>Gpr153</i>        | 0.49 | NM_178406.2 | MGI:1916157 |
| <i>Stard4</i>        | 0.49 |             | MGI:2156764 |
| <i>Mfrp</i>          | 0.49 | NM_147126.2 | MGI:2385957 |
| <i>Ela3</i>          | 0.5  | NM_026419.2 | MGI:1915118 |
| <i>Tslp</i>          | 0.5  | NM_021367.1 | MGI:1855696 |
| <i>Col8a1</i>        | 0.5  | NM_007739.2 | MGI:88463   |
| <i>C76566</i>        | 0.5  | NM_178879.3 | MGI:2142841 |
| <i>Itgbl1</i>        | 0.5  | NM_145467.1 | MGI:2443439 |
