# Supplementary material for: Skewed macrophage polarization in aging skeletal muscle
Source: PubMed Central journal article supplement (PMC6826159; doi:10.1111/acel.13032), 2019-09-02
Supplement: ACEL-18-e13032-s002.pdf [file ACEL-18-e13032-s002.pdf]

**Table S2: Genes significantly upregulated in Old BALB/c SKM**

| <b>Genes</b>  | <b>Fold changes (O/Y)</b> | <b>RefSeq Acc</b> | <b>MGI</b>  |
|---------------|---------------------------|-------------------|-------------|
| Cxcl10        | 26.38                     | NM_021274.1       | MGI:1352450 |
| Mmp12         | 17.42                     | NM_008605.3       | MGI:97005   |
| LOC631479     | 16.31                     |                   |             |
| Mmp27         | 16.23                     | NM_001030289.1    | MGI:3039232 |
| Sult1e1       | 14.73                     | NM_023135.1       | MGI:98431   |
| Erc2          | 14.45                     | NM_177814.4       | MGI:1098749 |
| C130026121Rik | 13.45                     |                   | MGI:3612702 |
| Slc35f3       | 12.87                     | NM_175434.2       | MGI:2444426 |
| Gdf5          | 12.6                      | NM_008109.1       | MGI:95688   |
| Chia          | 12.1                      | NM_023186.3       | MGI:1932052 |
| Meig1         | 11.83                     | NM_008579.4       | MGI:1202878 |
| Cd163l1       | 11.33                     | NM_172909.3       | MGI:2443796 |
| Gdf6          | 10.91                     | NM_013526.1       | MGI:95689   |
| Aox3          | 9.89                      | NM_023617.2       | MGI:1918974 |
| Cxcl13        | 9.85                      | NM_018866.2       | MGI:1888499 |
| Ggt6          | 9.7                       | NM_027819.2       | MGI:1918772 |
| Mt4           | 9.6                       | NM_008631.2       | MGI:99692   |
| AI593442      | 9.49                      |                   | MGI:2143099 |
| Ccl8          | 9.29                      | NM_021443.1       | MGI:101878  |
| Plcx3         | 9.14                      |                   | MGI:2442605 |
| 2010300C02Rik | 8.99                      |                   | MGI:1919347 |
| Rrad          | 8.86                      | NM_019662.2       | MGI:1930943 |
| Foxf2         | 8.21                      | NM_010225.1       | MGI:1347479 |
| Ankrd1        | 8.18                      | NM_013468.2       | MGI:1097717 |
| Cyp4f14       | 8.05                      | NM_022434.1       | MGI:1927669 |
| Clca1         | 7.92                      | NM_009899.3       | MGI:1316732 |
| S100a8        | 7.84                      | NM_013650.2       | MGI:88244   |
| Ces2          | 7.82                      | NM_145603.1       | MGI:2385905 |
| Mmp8          | 7.47                      | NM_008611.2       | MGI:1202395 |
| Dpp10         | 6.84                      | NM_199021.2       | MGI:2442409 |
| Ostn          | 6.48                      | NM_198112.1       | MGI:2677164 |
| 1700027A23Rik | 6.08                      | NM_029604.1       | MGI:1923670 |
| Pak1          | 5.95                      | NM_011035.2       | MGI:1339975 |
| 4930558C23Rik | 5.77                      |                   | MGI:1914904 |
| Acsm3         | 5.57                      | NM_016870.3       | MGI:99538   |
| Oit1          | 5.32                      | NM_146050.2       | MGI:1201784 |
| Clca3         | 5.24                      | NM_017474.1       | MGI:1346342 |
| Amy2-2        | 5.08                      | NM_001042711.1    | MGI:104547  |
| Eda2r         | 4.94                      |                   | MGI:2442860 |
| Mmp3          | 4.92                      | NM_010809.1       | MGI:97010   |
| Ankrd55       | 4.84                      |                   | MGI:1924568 |
| Eraf          | 4.84                      | NM_133245.1       | MGI:2158492 |
| 2310039D24Rik | 4.81                      |                   | MGI:1922954 |
| C4a           | 4.69                      | NM_011413.1       | MGI:98320   |
| Alb           | 4.64                      | NM_009654.1       | MGI:87991   |
| Pkp2          | 4.62                      | NM_026163.1       | MGI:1914701 |
| Rhpn2         | 4.55                      | NM_027897.2       | MGI:1289234 |
| Fgf21         | 4.34                      | NM_020013.2       | MGI:1861377 |
| Orm1          | 4.28                      | NM_008768.1       | MGI:97443   |
| Slc23a3       | 4.21                      | NM_194333.2       | MGI:104516  |
| Ctxn3         | 4.21                      |                   |             |
| Tead4         | 4.19                      |                   | MGI:106907  |
| 9830102E05Rik | 4.19                      | NM_177787.3       | MGI:3607714 |
| Elov6         | 4.18                      | NM_130450.2       | MGI:2156528 |
| Tmem45b       | 4.18                      | NM_144936.1       | MGI:2384574 |
| Cpne2         | 4.18                      | NM_153507.2       | MGI:2387578 |
| 6530401D17Rik | 4.15                      | NM_029541.1       | MGI:1923469 |
| Cd209a        | 4.14                      | NM_133238.2       | MGI:2157942 |
| Tdrd6         | 4.12                      | NM_198418.1       | MGI:2679727 |
| Mib1          | 4.12                      | NM_144860.2       | MGI:2443157 |

|               |      |                |             |
|---------------|------|----------------|-------------|
| D9Erd280e     | 4.04 | NM_177775.3    | MGI:1098699 |
| Amy1          | 4.03 | NM_007446.1    | MGI:88019   |
| Cd300lf       | 4.02 | NM_145634.2    | MGI:2442359 |
| C4b           | 4.01 | NM_009780.1    | MGI:88228   |
| Kcnj10        | 4    | NM_001039484.1 | MGI:1194504 |
| Kcne1l        | 4    | NM_021487.1    | MGI:1913490 |
| E030003E18Rik | 4    |                | MGI:2443348 |
| Mt2           | 3.86 | NM_008630.1    | MGI:97172   |
| Exph5         | 3.85 |                | MGI:2443248 |
| Mogat1        | 3.82 | NM_026713.1    | MGI:1915643 |
| Cpeb2         | 3.8  | NM_175937.2    | MGI:2442640 |
| Cdkn1a        | 3.8  | NM_007669.2    | MGI:104556  |
| Rasd2         | 3.73 |                | MGI:1922391 |
| AU018778      | 3.71 | NM_144930.1    | MGI:2142687 |
| Scd1          | 3.63 | NM_009127.3    | MGI:98239   |
| 9530080O11Rik | 3.6  | NM_175680.2    | MGI:2441751 |
| Kng1          | 3.52 | NM_023125.2    | MGI:1097705 |
| Tubb6         | 3.52 | NM_026473.2    | MGI:1915201 |
| Gsta3         | 3.48 | NM_001077353.1 | MGI:95856   |
| Inmt          | 3.47 | NM_009349.1    | MGI:102963  |
| EG624219      | 3.47 |                | MGI:3643534 |
| 2810032G03Rik | 3.46 | NM_028318.2    | MGI:1919919 |
| Serpina3n     | 3.4  | NM_009252.1    | MGI:105045  |
| A730060N03Rik | 3.4  |                | MGI:2444190 |
| 2900062L11Rik | 3.4  | NM_029823.1    | MGI:1924226 |
| 1810022C23Rik | 3.39 | NM_026947.3    | MGI:1916373 |
| Il17re        | 3.38 | NM_145826.2    | MGI:1889371 |
| 4931408D14Rik | 3.36 |                | MGI:1924309 |
| Grin3b        | 3.36 | NM_130455.2    | MGI:2150393 |
| A2m           | 3.32 | NM_175628.2    | MGI:2449119 |
| Cds1          | 3.28 | NM_173370.3    | MGI:1921846 |
| Acvr1c        | 3.26 | NM_001033369.1 | MGI:2661081 |
| Fgf10         | 3.26 | NM_008002.3    | MGI:1099809 |
| Shroom3       | 3.22 | NM_015756.2    | MGI:1351655 |
| Slc1a1        | 3.21 | NM_009199.2    | MGI:105083  |
| Cd209d        | 3.2  | NM_130904.2    | MGI:2157947 |
| Trp63         | 3.2  | NM_011641.1    | MGI:1330810 |
| Nap1l5        | 3.15 | NM_021432.1    | MGI:1923555 |
| Aldh1a7       | 3.1  | NM_011921.2    | MGI:1347050 |
| E130218I03Rik | 3.04 |                | MGI:3528958 |
| Snf1lk        | 3.04 | NM_010831.2    | MGI:104754  |
| Gadd45a       | 3.04 | NM_007836.1    | MGI:107799  |
| Gsta1         | 3.03 | NM_008181.2    | MGI:1095417 |
| Tiam2         | 2.98 | NM_011878.1    | MGI:1344338 |
| Actr3b        | 2.97 |                | MGI:2661120 |
| EG653016      | 2.97 | XM_001000918.1 |             |
| Brsk2         | 2.96 | NM_029426.2    | MGI:1923020 |
| 4922505G16Rik | 2.95 | NM_001039557.1 | MGI:3603828 |
| Gm1305        | 2.91 |                | MGI:2686151 |
| Tmem8         | 2.85 | NM_021793.1    | MGI:1926283 |
| Prkcz         | 2.84 | NM_008860.2    | MGI:97602   |
| Katnal2       | 2.81 |                | MGI:1924234 |
| BC033932      | 2.8  |                | MGI:3525074 |
| AK129341      | 2.78 | NM_001045524.1 | MGI:2680221 |
| Il12rb1       | 2.78 | NM_008353.1    | MGI:104579  |
| Gdf7          | 2.77 | NM_013527.1    | MGI:95690   |
| Gsdma1        | 2.77 | NM_021347.2    | MGI:1889509 |
| Gm1157        | 2.75 | NM_001033473.1 |             |
| Arrdc2        | 2.74 | NM_027560.1    | MGI:1918057 |
| Slc25a1       | 2.73 | NM_153150.1    | MGI:1345283 |
| Serpina1a     | 2.73 | NM_009243.3    | MGI:891971  |
| Dntt          | 2.72 | NM_009345.2    | MGI:98659   |
| Tdrkh         | 2.7  |                | MGI:1919884 |

|                    |      |                |             |
|--------------------|------|----------------|-------------|
| Nmbr               | 2.69 | NM_008703.2    | MGI:1100525 |
| Apoc1              | 2.69 | NM_007469.2    | MGI:88053   |
| Ccdc85a            | 2.69 | NM_181577.2    | MGI:2445069 |
| 4833427F10Rik      | 2.69 |                | MGI:1921851 |
| Prkar2b            | 2.68 | NM_011158.3    | MGI:97760   |
| Foxd1              | 2.67 | NM_008242.1    | MGI:1347463 |
| Tmco4              | 2.66 | NM_029857.2    | MGI:1924306 |
| Ttc9               | 2.65 | NM_001033149.1 | MGI:1916730 |
| Al851790           | 2.64 | NM_182807.2    | MGI:2143691 |
| Ttc25              | 2.63 |                | MGI:1921657 |
| 1810032O08Rik      | 2.6  |                | MGI:1913543 |
| Tmem100            | 2.59 | NM_026433.1    | MGI:1915138 |
| Cd27               | 2.59 | NM_001033126.2 | MGI:88326   |
| Itgax              | 2.58 | NM_021334.2    | MGI:96609   |
| Itgb8              | 2.57 |                | MGI:1338035 |
| LOC674832          | 2.54 | XM_977358.1    |             |
| 4430402I18Rik      | 2.53 | NM_198651.2    | MGI:1918036 |
| Slc6a7             | 2.52 | NM_201353.1    | MGI:2147363 |
| Snca               | 2.52 | NM_001042451.1 | MGI:1277151 |
| Ctsw               | 2.52 | NM_009985.2    | MGI:1338045 |
| Rai14              | 2.52 | NM_030690.2    | MGI:1922896 |
| Ripply1            | 2.52 | NM_001037915.1 | MGI:3614797 |
| Itih3              | 2.51 | NM_008407.1    | MGI:96620   |
| Tnfrsf12a          | 2.49 | NM_013749.1    | MGI:1351484 |
| Krt18              | 2.49 | NM_010664.1    | MGI:96692   |
| 2310040C09Rik      | 2.48 | NM_178618.3    | MGI:1916890 |
| 2610019F03Rik      | 2.47 | NM_173744.2    | MGI:1919398 |
| 1600029D21Rik      | 2.47 | NM_029639.1    | MGI:1923759 |
| Polq               | 2.46 | NM_029977.1    | MGI:2155399 |
| LOC548103          | 2.44 |                |             |
| OTTMUSG00000001246 | 2.43 | NM_001013393.1 |             |
| Fetub              | 2.43 |                | MGI:1890221 |
| 2010107G23Rik      | 2.43 | NM_027251.2    | MGI:1917144 |
| A630034I12Rik      | 2.42 |                | MGI:3041215 |
| Upp2               | 2.42 |                | MGI:1923904 |
| Cpne7              | 2.42 | NM_170684.2    | MGI:2142747 |
| Hsf2bp             | 2.41 |                | MGI:1921627 |
| 1300007F04Rik      | 2.39 | NM_026185.2    | MGI:1914727 |
| Atp1a3             | 2.39 | NM_144921.1    | MGI:88107   |
| Xrra1              | 2.38 |                | MGI:2181647 |
| Plin               | 2.37 | NM_175640.1    | MGI:1890505 |
| Klk1               | 2.37 | NM_010639.5    | MGI:102850  |
| Apod               | 2.36 | NM_007470.3    | MGI:88056   |
| Chdh               | 2.35 |                | MGI:1860776 |
| C030044O21Rik      | 2.35 |                | MGI:2444758 |
| Lgals3             | 2.34 | NM_010705.1    | MGI:96778   |
| Smoc1              | 2.32 | NM_022316.1    | MGI:1929878 |
| Gys2               | 2.32 | NM_145572.1    | MGI:2385254 |
| Tekt1              | 2.31 | NM_011569.2    | MGI:1333819 |
| Slc6a17            | 2.31 | NM_172271.1    | MGI:2442535 |
| Fasn               | 2.31 | NM_007988.3    | MGI:95485   |
| Hook1              | 2.3  |                | MGI:1925213 |
| Foxq1              | 2.3  | NM_008239.3    | MGI:1298228 |
| Ripk4              | 2.3  | NM_023663.3    | MGI:1919638 |
| Wnt2b              | 2.27 | NM_009520.3    | MGI:1261834 |
| Abcc8              | 2.27 | NM_011510.3    | MGI:1352629 |
| Tjp3               | 2.26 | NM_013769.2    | MGI:1351650 |
| Spp1               | 2.26 | NM_009263.1    | MGI:98389   |
| 4933437F05Rik      | 2.25 | NM_027744.1    | MGI:1918525 |
| Cx3cl1             | 2.25 | NM_009142.3    | MGI:1097153 |
| Aldh1a1            | 2.25 | NM_013467.3    | MGI:1353450 |
| Rgs7               | 2.24 | NM_011880.1    | MGI:1346089 |
| Stab2              | 2.24 | NM_138673.1    | MGI:2178743 |

|               |      |                |             |
|---------------|------|----------------|-------------|
| 1700016J18Rik | 2.23 |                | MGI:1922811 |
| Mtap7         | 2.23 |                | MGI:1328328 |
| Crtac1        | 2.23 | NM_145123.3    | MGI:1920082 |
| Ush1c         | 2.22 | NM_023649.1    | MGI:1919338 |
| Kcns3         | 2.22 | NM_173417.1    | MGI:1098804 |
| Pde4b         | 2.21 | NM_019840.2    | MGI:99557   |
| A830073O21Rik | 2.21 |                | MGI:2443692 |
| Gchfr         | 2.21 | NM_177157.3    | MGI:2443977 |
| 0610040J01Rik | 2.2  | NM_029554.2    | MGI:1923511 |
| 1700007K13Rik | 2.2  | NM_027040.1    | MGI:1916577 |
| Zap70         | 2.2  | NM_009539.2    | MGI:99613   |
| Zmynd10       | 2.18 | NM_053253.2    | MGI:2387863 |
| 5033411D12Rik | 2.18 | NM_138654.2    | MGI:2178827 |
| Klhdc7a       | 2.17 | NM_173427.2    | MGI:2444612 |
| 8430408G22Rik | 2.16 | NM_145980.1    | MGI:1918730 |
| Car5b         | 2.16 | NM_019513.1    | MGI:1926249 |
| Ckmt1         | 2.15 | NM_009897.2    | MGI:99441   |
| Tph2          | 2.15 | NM_173391.1    | MGI:2651811 |
| Ropn1l        | 2.14 | NM_145852.2    | MGI:2182357 |
| BC049352      | 2.14 |                | MGI:3040681 |
| Serpina1c     | 2.14 | NM_009245.2    | MGI:891969  |
| Runx1         | 2.14 | NM_009821.1    | MGI:99852   |
| Rprml         | 2.13 | NM_001033212.1 | MGI:2144486 |
| Zfp697        | 2.13 |                | MGI:2139736 |
| Abca6         | 2.12 |                | MGI:1923434 |
| Gsta2         | 2.1  |                | MGI:95863   |
| Coro2a        | 2.1  |                | MGI:1345966 |
| Myog          | 2.1  | NM_031189.1    | MGI:97276   |
| Mpzl2         | 2.1  | NM_007962.2    | MGI:1289160 |
| Al451557      | 2.09 | NM_001033207.1 | MGI:2142553 |
| Glis1         | 2.08 | NM_147221.1    | MGI:2386723 |
| Klk1b5        | 2.08 | NM_008456.2    | MGI:892020  |
| H2-Q7         | 2.08 |                | MGI:95936   |
| Ankrd32       | 2.08 | NM_134071.2    | MGI:2145448 |
| Acaca         | 2.07 | NM_133360.1    | MGI:108451  |
| Dock5         | 2.07 |                | MGI:1916063 |
| Fscn2         | 2.06 | NM_172802.1    | MGI:2443337 |
| Cpne6         | 2.06 | NM_009947.2    | MGI:1334445 |
| Cyr61         | 2.06 | NM_010516.1    | MGI:88613   |
| Lrrc8b        | 2.06 |                | MGI:2141353 |
| Pde7a         | 2.05 | NM_008802.1    | MGI:1202402 |
| Efhc2         | 2.05 | NM_028916.1    | MGI:1921655 |
| Dennd2d       | 2.05 | NM_028110.1    | MGI:2181193 |
| 1190002H23Rik | 2.05 | NM_025427.1    | MGI:1913464 |
| Pparg         | 2.05 | NM_011146.1    | MGI:97747   |
| Fbxl13        | 2.05 | NM_177076.2    | MGI:2443416 |
| Ankrd5        | 2.04 | NM_175667.2    | MGI:2441685 |
| Sncg          | 2.03 | NM_011430.1    | MGI:1298397 |
| Il20rb        | 2.02 | NM_001033543.1 | MGI:2143266 |
| Serpina1e     | 2.02 | NM_009247.2    | MGI:891967  |
| LOC665918     | 2.02 |                |             |
| Spsb2         | 2.01 | NM_013539.1    | MGI:1315199 |
| Gpnmb         | 2.01 | NM_053110.2    | MGI:1934765 |
| Cd209f        | 2.01 |                | MGI:1916392 |
| Mbp           | 2    | NM_001025245.1 | MGI:96925   |
| Nfkb2         | 2    | NM_019408.2    | MGI:1099800 |
| Relb          | 2    | NM_009046.2    | MGI:103289  |
